# Supplementary figures and images for: Development and Evaluation of a Novel Radiotracer 125I-rIL-27 to Monitor Allotransplant Rejection by Specifically Targeting IL-27Rα
Source: Hindawi journal article supplement (doi:10.1155/2023/4200142), 2023-02-23

**A**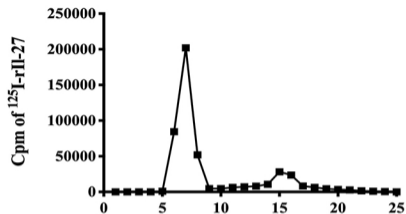**B**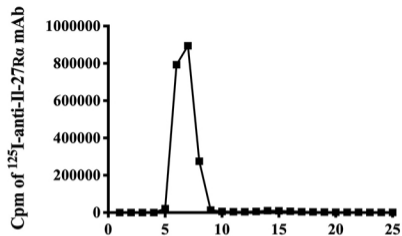**C**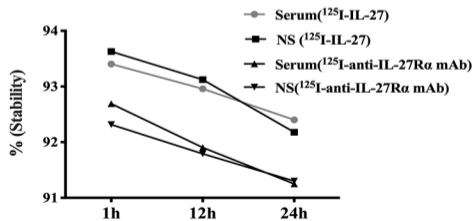

Supplement: f1 [file 4200142.f1.pdf]
